# Supplementary material for: Enzootic Circulation, Massive Gull Mortality and Poultry Outbreaks during the 2022/2023 High-Pathogenicity Avian Influenza H5N1 Season in the Czech Republic
Source: MDPI journal article supplement (doi:10.3390/v16020221), 2024-01-31
Supplement: s1 [file s1]

**Supplementary Table 1.** The overview of all H5N1 outbreaks and sampling events listed in chronological order.

| Strain ID | Collection Date | Category <sup>#</sup> | Name                                                                                                                                                                | Accession no.                                                                | Genotype |
|-----------|-----------------|-----------------------|---------------------------------------------------------------------------------------------------------------------------------------------------------------------|------------------------------------------------------------------------------|----------|
| 22394     | 2022-12-01      | Commercial A          | A/domestic_duck/Czech_Reublic/22394/2022                                                                                                                            | EPI_ISL_17584807                                                             | AB       |
| 22910     | 2022-12-08      | Backyard              | A/chicken/Czech_Republic/22910-1/2022<br>A/chicken/Czech_Republic/22910-2/2022<br>A/chicken/Czech_Republic/22910-3/2022                                             | EPI_ISL_16638641<br>EPI_ISL_16638642<br>EPI_ISL_16638643                     | AB       |
| 22911     | 2022-12-08      | Backyard              | A/chicken/Czech_Republic/22911-1/2022                                                                                                                               | EPI_ISL_16638676                                                             | AB       |
| 22912     | 2022-12-08      | Backyard              | A/domestic_duck/Czech_Republic/22912-1/2022                                                                                                                         | EPI_ISL_16638657                                                             | AB       |
| 22968     | 2022-12-10      | Backyard              | A/chicken/Czech_Republic/22968-3/2022<br>A/chicken/Czech_Republic/22968-2/2022<br>A/chicken/Czech_Republic/22968-1/2022<br>A/chicken/Czech_Republic/22968_orig/2022 | EPI_ISL_16937302<br>EPI_ISL_16937303<br>EPI_ISL_16937304<br>EPI_ISL_16997293 | AB       |
| 22969     | 2022-12-11      | Backyard              | A/chicken/Czech_Republic/22969-1/2022<br>A/chicken/Czech_Republic/22969-2/2022<br>A/chicken/Czech_Republic/22969-4/2022<br>A/chicken/Czech_Republic/22969-5/2022    | EPI_ISL_16937298<br>EPI_ISL_16937299<br>EPI_ISL_16937300<br>EPI_ISL_16937301 | AB       |
| 23309     | 2022-12-15      | Backyard              | A/chicken/Czech_Republic/23309-1orig/2022<br>A/chicken/Czech_Republic/23309-2orig/2022<br>A/chicken/Czech_Republic/23309-4orig/2022                                 | EPI_ISL_17164986<br>EPI_ISL_17164987<br>EPI_ISL_17164988                     | CH       |
| 23869     | 2022-12-28      | Backyard              | A/chicken/Czech_Republic/23869-1orig/2022<br>A/chicken/Czech_Republic/23869-2orig/2022                                                                              | EPI_ISL_17164989<br>EPI_ISL_17164990                                         | AB       |
| 24009     | 2022-12-30      | Commercial B          | A/chicken/Czech_Republic/24009-1/2022<br>A/chicken/Czech_Republic/24009-2/2022                                                                                      | EPI_ISL_16937296<br>EPI_ISL_16937297                                         | CH       |
| 11        | 2023-01-02      | Backyard              | A/chicken/Czech_Republic/11_orig/2023                                                                                                                               | EPI_ISL_17164982                                                             | AF       |
| 58        | 2023-01-02      | Commercial B          | A/chicken/Czech_Republic/58-shed-2A_orig/2023                                                                                                                       | EPI_ISL_17164991                                                             | CH       |
| 66        | 2023-01-02      | Commercial C          | A/turkey/Czech_Republic/66_orig/2023                                                                                                                                | EPI_ISL_17164992                                                             | AB       |
| 67        | 2023-01-03      | Backyard              | A/chicken/Czech_Republic/67_orig/2023                                                                                                                               | EPI_ISL_16613711                                                             | AF       |
| 94        | 2023-01-03      | Wild                  | A/greylag_goose/Czech_Republic/94_orig/2023                                                                                                                         | EPI_ISL_17164995                                                             | AB       |
| 102       | 2023-01-03      | Backyard              | A/chicken/Czech_Republic/102_orig/2023                                                                                                                              | EPI_ISL_16613712                                                             | AF       |
| 122       | 2023-01-04      | Commercial B          | unknown                                                                                                                                                             | -                                                                            | -        |
| 178       | 2023-01-04      | Commercial B          | A/chicken/Czech_Republic/178-shed-1A_orig/2023                                                                                                                      | EPI_ISL_16613713                                                             | CH       |
| 179       | 2023-01-04      | Commercial B          | A/chicken/Czech_Republic/179-shed-1B_orig/2023<br>A/chicken/Czech_Republic/179/2023                                                                                 | EPI_ISL_16613714<br>EPI_ISL_16937292                                         | CH       |
| 180       | 2023-01-04      | Commercial B          | A/chicken/Czech_Republic/180-shed-3A_orig/2023<br>A/chicken/Czech_Republic/180/2023                                                                                 | EPI_ISL_16613715<br>EPI_ISL_16937293                                         | CH       |
| 181       | 2023-01-04      | Commercial B          | A/chicken/Czech_Republic/181-shed-3B_orig/2023                                                                                                                      | EPI_ISL_17164983                                                             | CH       |
| 185       | 2023-01-04      | Backyard              | A/chicken/Czech_Republic/185_orig/2023                                                                                                                              | EPI_ISL_16613716                                                             | AB       |
| 186       | 2023-01-05      | Wild                  | A/mallard/Czech_Republic/186_orig/2023                                                                                                                              | EPI_ISL_16613717                                                             | CH       |
| 187       | 2023-01-05      | Backyard              | A/chicken/Czech_Republic/187-1orig/2023<br>A/chicken/Czech_Republic/187-2orig/2023                                                                                  | EPI_ISL_17164984<br>EPI_ISL_17164985                                         | AF       |
| 327       | 2023-01-06      | Backyard              | unknown                                                                                                                                                             | -                                                                            |          |
| 574       | 2023-01-12      | Backyard              | A/chicken/Czech_Republic/574/2023<br>A/chicken/Czech_Republic/574_orig/2023                                                                                         | EPI_ISL_16638696<br>EPI_ISL_16937294                                         | AF       |
| 636       | 2023-01-13      | Commercial D          | A/domestic_duck/Czech_Republic/636_orig/2023                                                                                                                        | EPI_ISL_16937295                                                             | CH       |
| 872       | 2023-01-13      | Commercial B          | A/chicken/Czech_Republic/872_orig/2023                                                                                                                              | EPI_ISL_16939160                                                             | CH       |
| 727       | 2023-01-16      | Backyard              | A/chicken/Czech_Republic/727_orig/2023                                                                                                                              | EPI_ISL_16937305                                                             | AF       |
| 811       | 2023-01-17      | Backyard              | A/swan/Czech_Republic/811-2/2023                                                                                                                                    | EPI_ISL_16937306                                                             | CH       |
| 951       | 2023-01-18      | Commercial E          | A/domestic_duck/Czech_Republic/951_orig/2023                                                                                                                        | EPI_ISL_16937307                                                             | AB       |
| 1220      | 2023-01-20      | Commercial E          | A/environment/Czech_Republic/1220-3_hall-8/2023<br>A/environment/Czech_Republic/1220-9_hall-8/2023<br>A/environment/Czech_Republic/1220-11_hall-8/2023              | EPI_ISL_16937309<br>EPI_ISL_16937310<br>EPI_ISL_16937311                     | AB       |

|      |            |              |                                                                                                                                                                                                                                                                                                                                                            |                                                                                                                                          |    |
|------|------------|--------------|------------------------------------------------------------------------------------------------------------------------------------------------------------------------------------------------------------------------------------------------------------------------------------------------------------------------------------------------------------|------------------------------------------------------------------------------------------------------------------------------------------|----|
| 1021 | 2023-01-20 | Wild         | A/mallard/Czech_Republic/1021/2023                                                                                                                                                                                                                                                                                                                         | EPI_ISL_16937308                                                                                                                         | CH |
| 1398 | 2023-01-25 | Commercial F | A/domestic_duck/Czech_Republic/1398/2023                                                                                                                                                                                                                                                                                                                   | EPI_ISL_16997751                                                                                                                         | AB |
| 1600 | 2023-01-29 | Backyard     | A/guineafowl/Czech_Republic/1600-1/2023<br>A/guineafowl/Czech_Republic/1600-2/2023<br>A/chicken/Czech_Republic/1600-1/2023<br>A/chicken/Czech_Republic/1600-2/2023                                                                                                                                                                                         | EPI_ISL_16997754<br>EPI_ISL_16997755<br>EPI_ISL_16997756<br>EPI_ISL_16997757                                                             | AB |
| 1690 | 2023-01-31 | Backyard     | A/chicken/Czech_Republic/1690/2023<br>A/chicken/Czech_Republic/1690_orig/2023                                                                                                                                                                                                                                                                              | EPI_ISL_16997752<br>EPI_ISL_16997753                                                                                                     | CH |
| 1792 | 2023-02-02 | Wild         | A/mallard/Czech_Republic/1792_orig/2023                                                                                                                                                                                                                                                                                                                    | EPI_ISL_16997758                                                                                                                         | CH |
| 2022 | 2023-02-06 | Wild         | A/swan/Czech_Republic/2022/2023                                                                                                                                                                                                                                                                                                                            | EPI_ISL_16997759                                                                                                                         | CH |
| 2749 | 2023-02-16 | Backyard     | A/chicken/Czech_Republic/2749-1/2023<br>A/chicken/Czech_Republic/2749-2/2023<br>A/chicken/Czech_Republic/2749-3/2023<br>A/domestic_duck/Czech_Republic/2749-5/2023                                                                                                                                                                                         | EPI_ISL_17015366<br>EPI_ISL_17015367<br>EPI_ISL_17015368<br>EPI_ISL_17015369                                                             | AB |
| 2750 | 2023-02-16 | Backyard     | A/chicken/Czech_Republic/2750-1/2023<br>A/chicken/Czech_Republic/2750-2/2023<br>A/chicken/Czech_Republic/2750-3/2023<br>A/chicken/Czech_Republic/2750-4/2023<br>A/chicken/Czech_Republic/2750-5/2023                                                                                                                                                       | EPI_ISL_17015359<br>EPI_ISL_17015360<br>EPI_ISL_17015362<br>EPI_ISL_17015363<br>EPI_ISL_17015364                                         | AB |
| 2753 | 2023-02-17 | Backyard     | A/domestic_goose/Czech_Republic/2753/2023                                                                                                                                                                                                                                                                                                                  | EPI_ISL_17015365                                                                                                                         | CH |
| 3051 | 2023-02-23 | Wild         | A/great_egret/Czech_Republic/3051-1orig/2023<br>A/great_egret/Czech_Republic/3051-2orig/2023                                                                                                                                                                                                                                                               | EPI_ISL_17164993<br>EPI_ISL_17164994                                                                                                     | CH |
| 3192 | 2023-02-27 | Backyard     | A/chicken/Czech_Republic/3192_orig/2023                                                                                                                                                                                                                                                                                                                    | EPI_ISL_17470101                                                                                                                         | AB |
| 3446 | 2023-03-02 | Backyard     | A/chicken/Czech_Republic/3446/2023<br>A/chicken/Czech_Republic/3446_orig/2023                                                                                                                                                                                                                                                                              | EPI_ISL_17470103<br>EPI_ISL_17470102                                                                                                     | AB |
| 4463 | 2023-03-22 | Backyard     | A/chicken/Czech_Republic/4463_orig/2023                                                                                                                                                                                                                                                                                                                    | EPI_ISL_17470104                                                                                                                         | AB |
| 4570 | 2023-03-24 | Wild         | unknown                                                                                                                                                                                                                                                                                                                                                    | -                                                                                                                                        |    |
| 5152 | 2023-04-04 | Wild         | A/black-headed_gull/Czech_Republic/5152-1/2023<br>A/black-headed_gull/Czech_Republic/5152-2/2023<br>A/black-headed_gull/Czech_Republic/5152-3/2023<br>A/black-headed_gull/Czech_Republic/5152-4/2023<br>A/black-headed_gull/Czech_Republic/5152-5/2023                                                                                                     | EPI_ISL_17470105<br>EPI_ISL_17470106<br>EPI_ISL_17470107<br>EPI_ISL_17470108<br>EPI_ISL_17470109                                         | BB |
| 5215 | 2023-04-04 | Backyard     | A/chicken/Czech_Reublic/5215_orig/2023                                                                                                                                                                                                                                                                                                                     | EPI_ISL_17584809                                                                                                                         | AB |
| 5295 | 2023-04-05 | Wild         | A/black-headed_gull/Czech_Republic/5295-3/2023                                                                                                                                                                                                                                                                                                             | EPI_ISL_17584810                                                                                                                         | BB |
| 5425 | 2023-04-11 | Wild         | A/black-headed_gull/Czech_Republic/5425-1/2023<br>A/black-headed_gull/Czech_Republic/5425-3/2023                                                                                                                                                                                                                                                           | EPI_ISL_17584811<br>EPI_ISL_17584812                                                                                                     | BB |
| 5452 | 2023-04-11 | Wild         | A/black-headed_gull/Czech_Republic/5452-1/2023<br>A/black-headed_gull/Czech_Republic/5452-2/2023<br>A/black-headed_gull/Czech_Republic/5452-3/2023<br>A/black-headed_gull/Czech_Republic/5452-4/2023                                                                                                                                                       | EPI_ISL_17584813<br>EPI_ISL_17584814<br>EPI_ISL_17584815<br>EPI_ISL_17584816                                                             | BB |
| 5487 | 2023-04-12 | Wild         | A/black-headed_gull/Czech_Republic/5487-2/2023<br>A/black-headed_gull/Czech_Republic/5487-4/2023<br>A/black-headed_gull/Czech_Republic/5487-5/2023                                                                                                                                                                                                         | EPI_ISL_17584817<br>EPI_ISL_17584818<br>EPI_ISL_17584819                                                                                 | BB |
| 5695 | 2023-04-13 | Wild         | A/black-headed_gull/Czech_Republic/5695-1/2023<br>A/black-headed_gull/Czech_Republic/5695-2/2023<br>A/black-headed_gull/Czech_Republic/5695-3/2023<br>A/black-headed_gull/Czech_Republic/5695-4/2023<br>A/black-headed_gull/Czech_Republic/5695-5/2023<br>A/black-headed_gull/Czech_Republic/5695-7/2023<br>A/black-headed_gull/Czech_Republic/5695-8/2023 | EPI_ISL_17584820<br>EPI_ISL_17584821<br>EPI_ISL_17584822<br>EPI_ISL_17584823<br>EPI_ISL_17584824<br>EPI_ISL_17584825<br>EPI_ISL_17584826 | BB |
| 6066 | 2023-04-20 | Wild         | A/black-headed_gull/Czech_Republic/6066-5/2023                                                                                                                                                                                                                                                                                                             | EPI_ISL_17584827                                                                                                                         | BB |
| 6577 | 2023-04-27 | Wild         | A/black-headed_gull/Czech_Republic/6577-1/2023<br>A/black-headed_gull/Czech_Republic/6577-2/2023<br>A/black-headed_gull/Czech_Republic/6577-3/2023<br>A/black-headed_gull/Czech_Republic/6577-4/2023<br>A/black-headed_gull/Czech_Republic/6577-5/2023                                                                                                     | EPI_ISL_17716810<br>EPI_ISL_17716811<br>EPI_ISL_17716812<br>EPI_ISL_17716813<br>EPI_ISL_17650916                                         | BB |
| 6633 | 2023-04-28 | Wild         | A/black-headed_gull/Czech_Republic/6633-1/2023<br>A/black-headed_gull/Czech_Republic/6633-2/2023                                                                                                                                                                                                                                                           | EPI_ISL_17716814<br>EPI_ISL_17716815                                                                                                     | BB |

|       |            |              |                                                                                                                                                                                                                                                                                                          |                                                                                                                                          |    |
|-------|------------|--------------|----------------------------------------------------------------------------------------------------------------------------------------------------------------------------------------------------------------------------------------------------------------------------------------------------------|------------------------------------------------------------------------------------------------------------------------------------------|----|
| 6634  | 2023-04-28 | Wild         | A/black-headed_gull/Czech_Republic/6634-1/2023<br>A/black-headed_gull/Czech_Republic/6634-2/2023<br>A/black-headed_gull/Czech_Republic/6634-3/2023<br>A/black-headed_gull/Czech_Republic/6634-4/2023<br>A/black-headed_gull/Czech_Republic/6634-5/2023                                                   | EPI_ISL_17716816<br>EPI_ISL_17650917<br>EPI_ISL_17650918<br>EPI_ISL_17650919<br>EPI_ISL_17650920                                         | BB |
| 6734  | 2023-05-02 | Commercial G | A/turkey/Czech_Republic/6734_orig/2023                                                                                                                                                                                                                                                                   | EPI_ISL_17650921                                                                                                                         | BB |
| 6735  | 2023-05-02 | Wild         | unknown                                                                                                                                                                                                                                                                                                  | -                                                                                                                                        | -  |
| 6947  | 2023-05-04 | Wild         | A/black-headed_gull/Czech_Republic/6947-1/2023<br>A/black-headed_gull/Czech_Republic/6947-3/2023<br>A/black-headed_gull/Czech_Republic/6947-4/2023                                                                                                                                                       | EPI_ISL_17716817<br>EPI_ISL_17716818<br>EPI_ISL_17716819                                                                                 | BB |
| 7123  | 2023-05-05 | Commercial G | A/turkey/Czech_Republic/7123-1/2023<br>A/turkey/Czech_Republic/7123-2/2023                                                                                                                                                                                                                               | EPI_ISL_17716820<br>EPI_ISL_17716821                                                                                                     | BB |
| 7124  | 2023-05-05 | Commercial G | A/turkey/Czech_Republic/7124-1/2023<br>A/turkey/Czech_Republic/7124-2/2023                                                                                                                                                                                                                               | EPI_ISL_17716822<br>EPI_ISL_17716823                                                                                                     | BB |
| 8807  | 2023-05-05 | Wild         | A/common_tern/Czech_Republic/8807-1/2023<br>A/common_tern/Czech_Republic/8807-4/2023<br>A/common_tern/Czech_Republic/8807-5/2023                                                                                                                                                                         | EPI_ISL_17884626<br>EPI_ISL_17884627<br>EPI_ISL_17884628                                                                                 | BB |
| 7334  | 2023-05-11 | Wild         | A/black-headed_gull/Czech_Republic/7334-4/2023<br>A/black-headed_gull/Czech_Republic/7334-5/2023                                                                                                                                                                                                         | EPI_ISL_17716824<br>EPI_ISL_17716825                                                                                                     | BB |
| 7459  | 2023-05-11 | Wild         | A/peregrine_falcon/Czech_Republic/7459-1/2023<br>A/peregrine_falcon/Czech_Republic/7459-2/2023<br>A/peregrine_falcon/Czech_Republic/7459-3/2023                                                                                                                                                          | EPI_ISL_17716826<br>EPI_ISL_17716827<br>EPI_ISL_17716828                                                                                 | BB |
| 7531  | 2023-05-12 | Backyard     | A/chicken/Czech_Republic/7531-1orig/2023<br>A/chicken/Czech_Republic/7531-1/2023<br>A/chicken/Czech_Republic/7531-2/2023<br>A/guinea_fowl/Czech_Republic/7531-2orig/2023<br>A/chicken/Czech_Republic/7531-3/2023<br>A/guinea_fowl/Czech_Republic/7531-4/2023<br>A/guinea_fowl/Czech_Republic/7531-5/2023 | EPI_ISL_17716832<br>EPI_ISL_17716829<br>EPI_ISL_17716830<br>EPI_ISL_17716809<br>EPI_ISL_17716831<br>EPI_ISL_17716807<br>EPI_ISL_17716808 | AB |
| 7735  | 2023-05-17 | Wild         | A/peregrine_falcon/Czech_Republic/7735-1/2023<br>A/peregrine_falcon/Czech_Republic/7735-2/2023<br>A/peregrine_falcon/Czech_Republic/7735-2_chymus/2023                                                                                                                                                   | EPI_ISL_17732338<br>EPI_ISL_17732339<br>EPI_ISL_17732340                                                                                 | BB |
| 8420  | 2023-05-26 | Wild         | A/peregrine_falcon/Czech_Republic/8420/2023                                                                                                                                                                                                                                                              | EPI_ISL_17884625                                                                                                                         | BB |
| 8527  | 2023-05-30 | Wild         | unknown                                                                                                                                                                                                                                                                                                  | -                                                                                                                                        | -  |
| 10854 | 2023-07-18 | Wild         | A/peregrine_falcon/Czech_Republic/10854/2023                                                                                                                                                                                                                                                             | EPI_ISL_18048779                                                                                                                         | BB |

# Capital letters denote multiple sampling of the same farm.
