# Supplementary material for: Enzootic Circulation, Massive Gull Mortality and Poultry Outbreaks during the 2022/2023 High-Pathogenicity Avian Influenza H5N1 Season in the Czech Republic
Source: MDPI journal article supplement (doi:10.3390/v16020221), 2024-01-31
Supplement: s1 [file s1]

Phylogenetic tree showing relationships between various bird species, primarily focusing on the family *Caprimulgidae* (Night Hawks). The tree is rooted at the top and branches downwards, indicating evolutionary relationships. Bootstrap values are provided for many of the internal nodes, representing the confidence in the branching order. The species names are listed along the branches, often including their common names and the specific individuals or populations studied. The tree is divided into several major clades, with some clades being more densely populated than others. The overall structure suggests a complex evolutionary history with many closely related species and some more distantly related ones. The tree is presented in a vertical orientation, with the root at the top and the tips of the branches at the bottom. The species names are written in a small, black font, and the bootstrap values are written in a slightly larger font. The tree is set against a white background, and the branches are represented by thin black lines. The overall layout is clean and professional, typical of a scientific publication. The tree is a complex network of lines and text, with many branches and nodes. The species names are written in a small, black font, and the bootstrap values are written in a slightly larger font. The tree is set against a white background, and the branches are represented by thin black lines. The overall layout is clean and professional, typical of a scientific publication. The tree is a complex network of lines and text, with many branches and nodes. The species names are written in a small, black font, and the bootstrap values are written in a slightly larger font. The tree is set against a white background, and the branches are represented by thin black lines. The overall layout is clean and professional, typical of a scientific publication.
